# Supplementary material for: Evaluation of pre-analytical factors impacting urine test strip and chemistry results
Source: publisher site journal article supplement (doi:10.1515/cclm-2024-1233), 2025-01-09
Supplement: Supplementary file 2 [file j_cclm-2024-1233_suppl_002.docx]

**Supplemental Material**

**Supplemental Table 1.** Analytical principles for urine test strips on CLINITEK Novus® Automated Urine Chemistry Analyzer (reflectometric measurements with CMOS digital imaging).

| **Test** | **Principle** |
| --- | --- |
| Bilirubin | Based on the coupling of bilirubin with diazotized dichloroaniline in a strongly acid medium. |
| Blood | Based on the peroxidase-like activity of hemoglobin, which catalyzes the reaction of diisopropylbenzene dihydroperoxide and 3,3',5,5'-tetramethylbenzidine. |
| Glucose | Based on a double sequential enzyme reaction. One enzyme, glucose oxidase, catalyzes the formation of gluconic acid and hydrogen peroxide from the oxidation of glucose. A second enzyme, peroxidase, catalyzes the oxidative coupling of 4-amino-antipyrine and 4-methylcatechol by hydrogen peroxide. |
| Ketones | Based on the reaction of nitroprusside with acetoacetic acid |
| Leukocytes | Granulocytic leukocytes contain esterases that catalyze the hydrolysis of the derivatized pyrrole amino acid ester to liberate 3-hydroxy-5- phenyl pyrrole. This pyrrole then reacts with a diazonium salt |
| Nitrite | At the acid pH of the test area, nitrite in the urine reacts with ρ-arsanilic acid to form a diazonium compound. This diazonium compound in turn couples with 1,2,3,4-tetrahydrobenzo(h)quinolin-3-o |
| pH | Based on a double indicator principle that gives a broad range of colors covering the entire urinary pH range |
| Protein | Based on the protein-error-of-indicators principle. At a constant pH, the presence of protein causes a change in the color of the indicator |
| Urobilinogen | Based on the Ehrlich reaction in which ρ-diethylaminobenzaldehyde in conjunction with a color enhancer reacts with urobilinogen in a strongly acid medium |
| Specific gravity (relative density) | Based on polyelectrolyte method |

**Supplemental Table 2.** Acceptable quality control performance for liquid QC on CLINITEK Novus® Automated Urine Chemistry Analyzer (reflectometric measurements with CMOS digital imaging).

| **Test** | **Acceptable Results for Negative QC** | **Acceptable Results for Positive QC** |
| --- | --- | --- |
| Bilirubin | Negative | Small, Moderate, or Large |
| Blood | Negative | Large |
| Glucose | Negative | 5.5 to 28 mmol/L |
| Ketones | Negative | Positive |
| Leukocytes | Negative | 70 to 500 Cells/uL |
| Nitrite | Negative | Positive |
| pH | 6.0 to 7.0 | ≥8.0 |
| Protein | Negative | Trace to 10 g/L |
| Urobilinogen | 3.2 to 16.0 umol/L | 16 to 33 umol/L |
| Specific gravity (relative density) | ≤1.006 | 1.004-1.014 |

**Supplemental Table 3.** Analytical principles for urine chemistry analysis.

| **Analyte** | **Principle** |
| --- | --- |
| *Alinity ci (Abbott Diagnostics)* | |
| Amylase | Colorimetric (ethylidebe-4-NP-G& (EPS)) |
| Albumin | Turbidimetry (polyclonal antibodies against human albumin) |
| Calcium | Colorimetric (Arzenazo-III) |
| Chloride | Indirect ion selective electrode |
| Cortisol | One-step immunoassay using chemiluminescent microparticle immunoassay |
| Creatinine | Colorimetric (alkaline picrate) |
| Magnesium | Enzymatic (isocitrate dehydrogenase) |
| Phosphorus | Colorimetric (ammonium molybdate) |
| Potassium | Indirect ion selective electrode |
| Protein | Turbidimetry (benzelthonium chloride as the protein denaturing agent) |
| Urea | Enzymatic (urease) |
| Urate | Enzymatic (uricase) |
| Sodium | Indirect ion selective electrode |
| *OsmoPro (Advanced Instruments)* | |
| Osmolality | Freezing point depression |

**Supplemental Table 4.** Analytical performance and allowable clinical limits for urine chemistry parameters.

| **Analyte** | **Level 1** | | | **Level 2** | | |
| --- | --- | --- | --- | --- | --- | --- |
| **Mean** | **CVa (%)** | **CD (%)** | **Mean** | **CVa (%)** | **CD (%)** |
| Albumin (g/L) | 43 | 4.1 | 11.4 | 110 | 4.7 | 12.9 |
| Amylase (U/L) | 52 | 2.3 | 6.5 | 179 | 1.2 | 3.3 |
| Calcium (mmol/L) | 1.71 | 1.8 | 4.9 | 2.46 | 1.2 | 3.4 |
| Chloride (mmol/L) | 89 | 1.1 | 3.1 | 194 | 0.9 | 2.5 |
| Cortisol (mmol/L) | 94 | 5.5 | 15.2 | 613 | 3.3 | 9.3 |
| Creatinine (umol/L) | 5026 | 2.0 | 5.5 | 11791 | 2.0 | 5.4 |
| Magnesium (mmol/L) | 1.72 | 2.3 | 6.5 | 3.62 | 1.9 | 5.3 |
| Phosphorus (mmol/L) | 8.07 | 2.1 | 5.8 | 15.6 | 1.8 | 5.0 |
| Potassium (mmol/L) | 30 | 0.9 | 2.5 | 71.4 | 1.0 | 2.7 |
| Protein (g/L) | 0.22 | 4.6 | 12.6 | 0.61 | 1.6 | 4.5 |
| Sodium (mmol/L) | 79 | 2.6 | 7.1 | 168 | 1.0 | 2.6 |
| Urea (mmol/L) | 149 | 2.1 | 5.8 | 262 | 2.1 | 5.7 |
| Urate (umol/L) | 692 | 2.3 | 6.3 | 1152 | 2.3 | 6.5 |
| Osmolality (mOsm/Kg) | 237 | 1.7 | 4.7 | 280 | 1.7 | 4.7 |

**Supplemental Table 5.** Percent agreement of non-preservative tubes kept at room temperature (RT) and refrigerated (2-8**°**C) at seven stability time points (4 to 96 hours) for urine test strips (N=20).

|  | **4 hours**  % agreement | | **6 hours**  % agreement | | **8 hours**  % agreement | | **24 hours**  % agreement | | **48 hours**  % agreement | | **72 hours**  % agreement | | **96 hours**  % agreement | |
| --- | --- | --- | --- | --- | --- | --- | --- | --- | --- | --- | --- | --- | --- | --- |
| **RT** | **2-8°C** | **RT** | **2-8°C** | **RT** | **2-8°C** | **RT** | **2-8°C** | **RT** | **2-8°C** | **RT** | **2-8°C** | **RT** | **2-8°C** |
| **Bilirubin** | 100% | 95.0% | 100% | 100% | 100% | 95.0% | 100% | 100% | 100% | 100% | 100% | 100% | 100% | 100% |
| **Blood** | 95.0% | 95.0% | 85.0% | 90.0% | 85.0% | 90.0% | 90.0% | 90.0% | 80.0% | 90.0% | 70.0% | 85.0% | 75.0% | 90.0% |
| **Glucose** | 100% | 100% | 100% | 100% | 100% | 95.0% | 100% | 95.0% | 100% | 95.0% | 85.0% | 95.0% | 85.0% | 100% |
| **Ketones** | 100% | 100% | 95.0% | 95.0% | 100% | 100% | 95.0% | 100% | 80.0% | 100% | 85.0% | 100% | 90.0% | 95.0% |
| **Leukocytes** | 85.0% | 90.0% | 85.0% | 95.0% | 85.0% | 85.0% | 85.0% | 90.0% | 75.0% | 90.0% | 85.0% | 80.0% | 80.0% | 85.0% |
| **Nitrites** | 100% | 100% | 100% | 100% | 100% | 100% | 95.0% | 100% | 90.0% | 100% | 90.0% | 100% | 85.0% | 100% |
| **pH** | 80.0% | 90.0% | 85.0% | 95.0% | 90.0% | 85.0% | 75.0% | 75.0% | 60.0% | 70.0% | 50.0% | 80.0% | 40.0% | 70.0% |
| **Protein** | 95.0% | 90.0% | 95.0% | 95.0% | 95.0% | 85.0% | 95.0% | 75.0% | 80.0% | 85.0% | 85.0% | 75.0% | 80.0% | 80.0% |
| **Specific Gravity (relative density)** | 100% | 85.0% | 100% | 95.0% | 100% | 90.0% | 100% | 95.0% | 100% | 90.0% | 95.0% | 95.0% | 90.0% | 85.0% |
| **Urobilinogen** | 95.0% | 95.0% | 95.0% | 95.0% | 95.0% | 95.0% | 95.0% | 100% | 95.0% | 95.0% | 85.0% | 95.0% | 85.0% | 95.0% |

**Supplemental Table 6.** Percent agreement preservative tubes kept at room temperature (RT) and refrigerated (2-8**°**C) at seven stability time points (4 to 96 hours) for urine test steps (N=20).

|  | **4 hours**  % agreement | | **6 hours**  % agreement | | **8 hours**  % agreement | | **24 hours**  % agreement | | **48 hours**  % agreement | | **72 hours**  % agreement | | **96 hours**  % agreement | |
| --- | --- | --- | --- | --- | --- | --- | --- | --- | --- | --- | --- | --- | --- | --- |
| **RT** | **2-8°C** | **RT** | **2-8°C** | **RT** | **2-8°C** | **RT** | **2-8°C** | **RT** | **2-8°C** | **RT** | **2-8°C** | **RT** | **2-8°C** |
| **Bilirubin** | 100% | 95.0% | 100% | 95.0% | 100% | 95.0% | 100% | 100% | 100% | 100% | 100% | 100% | 100% | 100% |
| **Blood** | 95.0% | 90.0% | 80.0% | 90.0% | 85.0% | 85.0% | 90.0% | 90.0% | 90.0% | 85.0% | 85.0% | 85.0% | 85.0% | 80.0% |
| **Glucose** | 95.0% | 100% | 100% | 100% | 100% | 95.0% | 100% | 95.0% | 100% | 95.0% | 100% | 95.0% | 100% | 95.0% |
| **Ketones** | 100% | 100% | 100% | 100% | 95.0% | 100% | 90.0% | 100% | 95.0% | 100% | 85.0% | 95.0% | 90.0% | 100% |
| **Leukocytes** | 95.0% | 95.0% | 95.0% | 95.0% | 95.0% | 95.0% | 85.0% | 100% | 75.0% | 90.0% | 60.0% | 75.0% | 75.0% | 90.0% |
| **Nitrites** | 100% | 100% | 100% | 100% | 100% | 100% | 100% | 100% | 100% | 100% | 100% | 100% | 95.0% | 100% |
| **pH** | 80.0% | 85.0% | 95.0% | 80.0% | 100% | 95.0% | 85.0% | 90.0% | 80.0% | 85.0% | 85.0% | 90.0% | 75.0% | 80.0% |
| **Protein** | 90.0% | 90.0% | 85.0% | 70.0% | 80.0% | 80.0% | 80.0% | 95.0% | 80.0% | 75.0% | 85.0% | 85.0% | 85.0% | 75.0% |
| **Specific Gravity (relative density)** | 90.0% | 85.0% | 90.0% | 90.0% | 95.0% | 95.0% | 85.0% | 90.0% | 85.0% | 85.0% | 80.0% | 90.0% | 80.0% | 80.0% |
| **Urobilinogen** | 95.0% | 100% | 95.0% | 100% | 95.0% | 100% | 95.0% | 100% | 95.0% | 100% | 90.0% | 100% | 90.0% | 100% |

**Supplemental Table 7.** Effect of underfilling preservative tubes for urine test strips relative to manufacturer recommendations (8mL).

| **Analyte** | **N** | **6 mL** | | **4 mL** | | **2 mL** | | **Acceptable Volume** |
| --- | --- | --- | --- | --- | --- | --- | --- | --- |
|  |  | **Cohen’s kappa** | **% agreement** | **Cohen’s kappa** | **% agreement** | **Cohen’s kappa** | **% agreement** |  |
| **Bilirubin** | 10 | 1.000 | 100% |  | 90% |  | 90% | **2 mL** |
| **Blood** | 10 | 0.957 | 90% | 1.000 | 100% | 0.963 | 90% | **2 mL** |
| **Glucose** | 10 | 1.000 | 100% | 1.000 | 100% | 1.000 | 100% | **2 mL** |
| **Ketones** | 10 | 1.000 | 100% | 1.000 | 100% | 0.844 | 90% | **2 mL** |
| **Leukocytes** | 10 | 0.974 | 90% | 0.974 | 90% | 0.944 | 80% | **2 mL** |
| **Nitrites** | 10 | 1.000 | 100% | 1.000 | 100% | 1.000 | 100% | **2 mL** |
| **pH** | 10 | 0.965 | 90% | 0.965 | 90% | 0.923 | 80% | **2 mL** |
| **Protein** | 10 | 0.981 | 90% | 0.939 | 70% | 0.892 | 50% | **2 mL** |
| **Specific Gravity (relative density)** | 10 | 1.000 | 100% | 0.919 | 70% | 0.909 | 70% | **2 mL** |
| **Urobilinogen** | 10 | 1.000 | 100% | 1.000 | 100% | 1.000 | 100% | **2 mL** |

**Supplemental Table 8.** Effect of centrifuging preservative tubes prior to urine test strip measurement.

| **Analyte** | **N** | **Post-Centrifugation** | | **Acceptable:** |
| --- | --- | --- | --- | --- |
|  |  | **Cohen’s kappa** | **% agreement** |  |
| **Bilirubin** | 10 | 1.000 | 100% | **Yes** |
| **Blood** | 10 | 0.965 | 90% | **Yes** |
| **Glucose** | 10 | 0.932 | 90% | **Yes** |
| **Ketones** | 10 | 1.000 | 100% | **Yes** |
| **Leukocytes** | 10 | 0.937 | 70% | **Yes** |
| **Nitrites** | 10 | 1.000 | 100% | **Yes** |
| **pH** | 10 | 0.916 | 80% | **Yes** |
| **Protein** | 10 | 0.976 | 90% | **Yes** |
| **Specific Gravity**  **(relative density)** | 10 | 1.000 | 100% | **Yes** |
| **Urobilinogen** | 10 | 1.000 | 100% | **Yes** |

**Supplemental Table 9**. Stability of urine chemistry analytes stored at room temperature for all time points.

| **Analyte** | **Statistic** |  | | | | **Percent Difference (%)** | | | | **CD** | **Stability** |
| --- | --- | --- | --- | --- | --- | --- | --- | --- | --- | --- | --- |
| **Baseline** | **4h** | **6h** | **8h** | **24h** | **48h** | **72h** | **96h** |
| **Amylase (U/L)** | **Mean (SD)** | 150 (72.6) | 0.494 (1.91) | 0.408 (2.00) | 0.503 (2.12) | 0.00 (0.00) | 7.12 (21.6) | 4.22 (12.6) | -0.434 (3.18) | 3.3% | 96 hours |
| **Median**  **[Min, Max]** | 189  [35.0, 228] | 0 .00  [-1.04, 5.71] | 0.00  [-1.33, 5.71] | 0.00  [-2.08, 5.71] | 0.00  [0.00, 0.00] | 0.439  [-1.33, 68.6] | 0.439  [-1.33, 40.0] | 0.767  [-8.57, 2.19] |
| **Albumin (g/L)** | **Mean (SD)** | 162 (197) | 0.413 (0.957) | 0.063 (0.808) | 0.790 (1.19) | 2.53 (4.39) | 3.02 (4.56) | 2.66 (4.43) | 1.90 (2.17) | 11.4% | 96 hours |
| **Median**  **[Min, Max]** | 56.0  [5.00, 500] | 0.00  [0.00, 2.91] | 0.00  [-1.56, 1.83] | 0.00  [0.00, 2.55] | 0.915  [0.00, 14.3] | 1.04  [0.00, 14.3] | 0.915  [0.00, 14.3] | 0.781  [0.00, 4.73] |
| **Calcium**  **(mmol/L)** | **Mean (SD)** | 1.22 (1.14) | 0.093 (0.753) | 0.124 (0.628) | 0.250 (0.703) | -0.202 (0.682) | 0.019 (0.506) | -0.018 (0.835) | 0.484 (0.719) | 4.9% | 96 hours |
| **Median**  **[Min, Max]** | 0.830  [0.500, 4.32] | 0 .00  [-1.20, 1.39] | 0.00  [-1.20, 0.943] | 0 .00  [-1.20, 1.40] | 0 .00  [-1.39, 0.917] | 0.00  [-1.20, 0.94] | 0.00  [-1.56, 1.39] | 0 .00  [0, 1.83] |
| **Chloride (mol/L)** | **Mean (SD)** | 71.0 (16.3) | 0.360 (0.780) | 0.364 (0.786) | 0.0749 (1.27) | 1.08 (0.798) | 0.135 (1.10) | 0.633 (0.865) | 1.32 (1.55) | 3.1% | 96 hours |
| **Median**  **[Min, Max]** | 69.0  [46.0, 100] | 0.00  [0.00, 2.17] | 0.00  [0.00, 2.17] | 0.00  [-1.59, 2.17] | 1.40  [0.00, 2.17] | 0.00  [-1.47, 2.17] | 0.00  [0.00, 2.17] | 1.45  [-1.59, 3.80] |
| **Cortisol (mmol/L)** | **Mean (SD)** | 94.3 (94.7) | 3.75 (9.11) | -1.05 (8.81) | -2.97 (5.10) | 1.46 (9.39) | 1.73 (11.9) | 3.13 (13.7) | 3.97 (13.3) | 15.2% | 96 hours |
| **Median**  **[Min, Max]** | 56.0  [28.0, 340] | -1.63  [-17.0, 11.4] | 1.21  [-20.6, 9.09] | -3.68  [-8.11, 3.57] | 0.00  [-14.4, 17.9] | 0.725  [-19.1, 28.6] | 0.806  [-18.2, 28.6] | 0.403  [-12.1, 31.8] |
| **Creatinine (umol/L)** | **Mean (SD)** | 6700 (2090) | -0.099 (0.673) | -0.957 (0.771) | 1.96 (2.20) | 1.57 (1.66) | 1.73 (1.94) | 0.822 (1.87) | 1.23 (1.45) | 5.5% | 96 hours |
| **Median**  **[Min, Max]** | 7050  [2950, 9680] | 0.152  [-1.33, 0.744] | -1.13  [-1.77, 0.357] | 2.91  [-1.59, 4.54] | 1.66  [-0.572, 3.59] | 2.11  [-1.05, 3.93] | 1.31  [-1.90, 3.87] | 1.19  [-1.05, 3.54] |
| **Magnesium (mmol/L)** | **Mean (SD)** | 1.84 (0.699) | -0.226 (2.66) | 0.453 (2.89) | 1.02 (1.70) | 2.01 (2.35) | 0.697 (1.95) | 1.04 (1.37) | 3.84 (2.51) | 5.5% | 96 hours |
| **Median**  **[Min, Max]** | 1.62 [1.11, 3.26] | 0.00  [-5.93, 3.60] | 0.769  [-5.93, 6.31] | 1.34  [-1.85, 4.50] | 2.14  [-1.23, 6.31] | 1.53  [-4.24, 2.31] | 0.714  [-1.05, 3.39] | 3.85  [-1.69, 8.11] |
| **Phosphorus (mmol/L)** | **Mean (SD)** | 16.2 (7.27) | 0.135 (1.32) | 0.616 (1.64) | 1.17 (1.92) | 0.839 (1.87) | -0.314 (1.66) | 0.921 (1.99) | 1.63 (1.32) | 5.0% | 96 hours |
| **Median**  **[Min, Max]** | 17.6  [2.53, 26.2] | 0.00  [-1.79, 2.53] | 0.00  [-0.756, 4.74] | 0.535  [-1.30, 5.93] | 1.10  [-2.24, 4.35] | 0.288  [-3.87, 2.13] | 0.640  [-2.86, 4.74] | 1.37  [0.208, 4.74] |
| **Potassium (mmol/L)** | **Mean (SD)** | 31.9 (18.1) | 0.217 (0.948) | 0.358 (0.879) | -0.132 (0.889) | 0.923 (0.782) | 0.640 (0.981) | 0.816 (0.487) | 1.65 (0.772) | 2.5% | 96 hours |
| **Median**  **[Min, Max]** | 31.7  [12.8, 76.6] | 0.151  [-1.24, 1.96] | 0.207  [-0.602, 2.09] | -0.301  [-1.24, 1.18] | 0.974  [-0.978, 1.82] | 0.477  [-0.602, 1.97] | 0.695  [0, 1.51] | 1.47  [0.571, 2.93] |
| **Protein (g/L)** | **Mean (SD)** | 0.367 (0.492) | -0.945 (2.06) | -1.36 (4.96) | -2.15 (6.63) | -3.54 (7.51) | -0.0953 (8.21) | 0.0497 (7.52) | 4.71 (9.00) | 12.1% | 96 hours |
| **Median**  **[Min, Max]** | 0.230  [0.100, 1.65] | 0.00  [-4.76, 0.606] | 0.00  [-13.0, 4.35] | 0.00  [-17.4, 4.35] | 0.00  [-21.7, 0] | 0.00  [-17.4, 14.0] | 0.00  [-13.0, 16.3] | 8.00  [-13.0, 18.6] |
| **Sodium (mmol/L)** | **Mean (SD)** | 75.0 (15.4) | 0.125 (1.06) | 1.06 (1.22) | 0.453 (1.03) | -1.02 (2.06) | -1.38 (1.84) | -1.46 (2.35) | 0.359 (1.90) | 7.1% | 96 hours |
| **Median**  **[Min, Max]** | 80.5  [47.0, 95.0] | 0.00  [-1.43, 1.92] | 1.09  [0, 3.85] | 0.00  [-1.43, 2.13] | -1.49  [-4.29, 2.13] | -1.33  [-4.29, 1.19] | -0.617  [-5.71, 1.19] | 0.714  [-2.86, 2.38] |
| **Urea (mmol/L)** | **Mean (SD)** | 206 (76.4) | 0.390 (1.57) | -0.485 (0.881) | -1.98 (2.22) | -1.12 (1.20) | -0.641 (1.43) | -0.800 (1.48) | 0.400 (1.90) | 5.8% | 96 hours |
| **Median**  **[Min, Max]** | 179  [107, 351] | 0.784  [-2.24, 2.11] | -0.291  [-1.92, 0.767] | -1.88  [-5.78, 0.533] | -1.16  [-3.07, 1.34] | -0.171  [-2.98, 1.17] | -1.05  [-2.98, 1.84] | 0.247  [-3.05, 3.26] |
| **Urate**  **(umol/L)** | **Mean (SD)** | 1400 (455) | -0.867 (1.35) | -0.145(1.27) | -0.334 (1.62) | -1.33 (1.99) | -1.88 (2.73) | -2.67 (2.01) | -2.48 (2.18) | 6.5% | 96 hours |
| **Median**  **[Min, Max]** | 1270  [646, 2170] | -1.01  [-3.28, 1.54] | -0.256  [-1.86, 2.37] | 0.00  [-3.56, 1.78] | -1.10  [-5.26, 2.05] | -1.49  [-7.89, 1.61] | -1.84  [-6.66, 0.085] | -1.80  [-7.18, -0.085] |
| **Osmolality (mOsm/Kg)** | **Mean (SD)** | 468 (158) | 0.405 (0.615) | 0.446 (0.441) | 0.557 (0.488) | 0.289 (0.812) | 1.23 (0.972) | 2.14 (1.80) | 3.02 (2.84) | 4.7% | 96 hours |
| **Median**  **[Min, Max]** | 408  [299, 754] | 0.153  [-0.243, 1.48] | 0.418  [-0.168, 1.07] | 0.432  [0.00, 1.38] | 0.225  [-0.765, 1.67] | 1.15  [-0.243, 3.02] | 1.84  [-0.243, 5.70] | 1.99  [0.730, 10.1] |

**Supplemental Table 10**. Stability of urine chemistry analytes stored at 2-8°C for all time points.

| **Analyte** | **Statistic** |  | | | | **Percent Difference (%)** | | | | **CD** | **Stability** |
| --- | --- | --- | --- | --- | --- | --- | --- | --- | --- | --- | --- |
| **Baseline** | **4h** | **6h** | **8h** | **24h** | **48h** | **72h** | **96h** |
| **Amylase (U/L)** | **Mean (SD)** | 150 (72.6) | -0.222 (1.35) | -0.314 (1.32) | 0.182 (1.22) | -0.0703 (1.21) | 0.295 (1.25) | -0.318 (1.41) | -0.0909 (2.48) | 3.3% | 96 hours |
| **Median**  **[Min, Max]** | 189  [35.0, 228] | -0.478  [-2.08, 2.86] | -0.508  [-2.08, 2.86] | 0.00  [-1.33, 2.86] | 0.00  [-2.08, 2.86] | 0.00  [-1.04, 2.86] | -0.473  [-2.08, 2.86] | -0.249  [-4.00, 5.71] |
| **Albumin (g/L)** | **Mean (SD)** | 162 (197) | 0.743 (1.21) | -1.72 (4.52) | -1.25 (4.80) | 0.998 (7.39) | -0.887 (4.79) | 0.923 (1.80) | 0.684 (2.10) | 11.4% | 96 hours |
| **Median**  **[Min, Max]** | 56.0  [5.00, 500] | 0.00  [0.00, 2.91] | 0.00  [-14.3, 1.09] | 0.00  [-14.3, 2.18] | 0.610  [-14.3, 14.3] | 0.00  [-14.3, 2.13] | 0.00  [0, 4.36] | 0.00  [-3.13, 4.26] |
| **Calcium**  **(mmol/L)** | **Mean (SD)** | 1.22 (1.14) | -0.205 (0.826) | -0.129 (0.590) | -0.312 (0.916) | -0.350 (0.612) | -0.311 (0.735) | -0.555 (1.15) | 0.269 (0.753) | 4.9% | 96 hours |
| **Median**  **[Min, Max]** | 0.830  [0.500, 4.32] | 0.00  [-2.41, 0.231] | 0.00  [-2.41, 0.935] | 0.00  [-1.39, 0.917] | 0.00  [-2.41, 0.917] | 0.00  [-1.39, 0.467] | 0.00  [-2.41, 0] | 0.00  [-2.83, 0.467] |
| **Chloride (mol/L)** | **Mean (SD)** | 71.0 (16.3) | 0.146 (0.904) | 0.463 (1.11) | 0.253 (0.900) | -0.0326 (1.16) | 0.426 (1.36) | -0.447 (1.46) | 0.374 (1.29) | 3.1% | 96 hours |
| **Median**  **[Min, Max]** | 69.0  [46.0, 100] | 0.00  [-1.08, 2.53] | 0.00  [-1.08, 2.53] | 0.00  [-1.08, 2.17] | 0.00  [-1.59, 2.17] | 0.00  [-1.27, 3.00] | 0.00  [-2.53, 2.17] | 0.500  [-1.72, 2.17] |
| **Cortisol (mmol/L)** | **Mean (SD)** | 94.3 (94.7) | -7.73 (11.3) | -4.75 (9.03) | -5.65 (13.4) | 1.95 (8.88) | -1.96 (9.01) | -4.86 (8.42) | -4.16 (8.88) | 15.2% | 96 hours |
| **Median**  **[Min, Max]** | 56.0  [28.0, 340] | -6.34  [-25.9, 7.14] | -4.17  [-19.4, 7.14] | -11.7  [-13.5, 14.3] | 2.30  [-17.6, 13.5] | -0.906  [-20.9, 14.3] | -4.35  [-16.8, 6.82] | -1.63  [-22.9, 9.09] |
| **Creatinine (umol/L)** | **Mean (SD)** | 6700 (2090) | -0.770 (1.10) | -0.850 (0.735) | 2.04 (1.87) | 1.74 (1.43) | 1.76 (1.16) | 0.863 (1.62) | 1.18 (1.85) | 5.5% | 96 hours |
| **Median**  **[Min, Max]** | 7050  [2950, 9680] | -0.645  [-2.31, 0.636] | -0.985  [-1.83, 0.326] | 2.27  [-0.617, 4.49] | 2.11  [-0.160, 3.36] | 1.99  [-0.068, 3.40] | 0.905  [-2.34, 3.11] | 1.71  [-1.72, 3.47] |
| **Magnesium (mmol/L)** | **Mean (SD)** | 1.84 (0.699) | -0.00696 (2.29) | -0.347 (1.61) | 0.464 (1.89) | 1.28 (2.68) | 0.0221 (1.90) | -0.237 (1.69) | 1.77 (2.17) | 5.5% | 96 hours |
| **Median**  **[Min, Max]** | 1.62  [1.11, 3.26] | 0.702  [-5.93, 2.31] | 0.00  [-2.80, 2.70] | 0.00  [-2.14, 3.85] | 1.53  [-4.24, 6.31] | 0.702  [-4.29, 2.12] | 0.00  [-5.08, 1.23] | 1.59  [-2.14, 6.31] |
| **Phosphorus (mmol/L)** | **Mean (SD)** | 16.2 (7.27) | 0.320 (1.59) | 0.532 (1.92) | 0.732 (1.75) | 0.391 (1.49) | -0.616 (1.48) | 1.36 (1.75) | 0.329 (0.936) | 5.0% | 96 hours |
| **Median**  **[Min, Max]** | 17.6  [2.53, 26.2] | -0.293  [-1.35, 4.35] | 0.312  [-2.69, 5.14] | 0.314  [-1.15, 5.14] | 0.171  [-1.68, 3.95] | -0.577  [-3.03, 1.69] | 1.22  [-0.510, 5.53] | 0.0510  [-1.01, 2.26] |
| **Potassium (mmol/L)** | **Mean (SD)** | 31.9 (18.1) | 0.0535 (0.696) | 0.159 (0.861) | 0.0700 (1.03) | 0.319 (1.08) | 0.453 (2.21) | 0.304 (1.13) | -0.478 (1.43) | 2.5% | 96 hours |
| **Median**  **[Min, Max]** | 31.7  [12.8, 76.6] | 0.0653  [-1.51, 0.984] | 0.00  [-1.20, 1.82] | -0.151  [-1.22, 2.35] | 0.286  [-1.47, 1.83] | 0.00  [-1.51, 6.23] | 0.692  [-1.71, 1.52] | -0.207  [-3.61, 1.18] |
| **Protein (g/L)** | **Mean (SD)** | 0.367 (0.492) | -2.01 (3.23) | -2.02 (7.35) | -2.79 (5.71) | -2.47 (5.13) | -3.39 (7.14) | -3.04 (5.69) | -3.65 (8.83) | 12.1% | 96 hours |
| **Median**  **[Min, Max]** | 0.230  [0.100, 1.65] | 0.00  [-8.70, 0] | 0.00  [-17.4, 8.70] | 0.00  [-17.4, 0] | -1.16  [-13.0, 4.35] | 0.00  [-21.7, 0] | 0.00  [-17.4, 0] | 0.00  [-26.1, 4.35] |
| **Sodium (mmol/L)** | **Mean (SD)** | 75.0 (15.4) | -0.120 (1.68) | -0.466 (1.65) | 0.163 (1.19) | -1.20 (1.42) | -2.06 (1.70) | -2.08 (2.11) | -0.999 (2.03) | 7.1% | 96 hours |
| **Median**  **[Min, Max]** | 80.5  [47.0, 95.0] | 0.00  [-3.70, 1.92] | 0.00  [-3.70, 1.92] | 0.00  [-1.43, 1.92] | -1.49  [-2.86, 1.19] | -2.47  [-4.29, 1.19] | -2.68  [-4.29, 2.13] | -1.59  [-4.29, 2.13] |
| **Urea (mmol/L)** | **Mean (SD)** | 206 (76.4) | -0.684 (0.845) | -0.714 (1.64) | -1.79 (2.05) | -0.914 (1.57) | -1.50 (2.04) | -1.17 (1.32) | -1.08 (2.32) | 5.8% | 96 hours |
| **Median**  **[Min, Max]** | 179  [107, 351] | -0.754  [-1.96, 0.785] | -1.13  [-2.72, 2.20] | -2.20  [-5.59, 1.22] | -1.31  [-3.17, 1.20] | -1.50  [-4.73, 2.01] | -1.20  [-3.35, 0.767] | -1.37  [-4.59, 1.98] |
| **Urate**  **(umol/L)** | **Mean (SD)** | 1400 (455) | -0.719 (1.27) | 0.187 (1.64) | -0.006 (1.55) | -1.85 (2.17) | -1.60 (1.67) | -1.46 (2.24) | -1.94 (2.27) | 6.5% | 96 hours |
| **Median**  **[Min, Max]** | 1270  [646, 2170] | -0.721  [-3.02, 1.35] | 0.592  [-2.63, 2.89] | 0.341  [-3.28, 2.05] | -2.09  [-4.80, 1.81] | -1.35  [-5.42, 0.710] | -1.85  [-5.88, 2.29] | -1.49  [-7.43, 1.34] |
| **Osmolality (mOsm/Kg)** | **Mean (SD)** | 468 (158) | 0.489 (0.550) | 0.299 (0.451) | 0.455 (0.574) | 0.344 (0.614) | 0.189 (0.911) | 0.465 (1.11) | 0.142 (0.985) | 4.7% | 96 hours |
| **Median**  **[Min, Max]** | 408  [299, 754] | 0.581  [-0.612, 1.22] | 0.352  [-0.61, 0.917] | 0.660  [-0.612, 1.00] | 0.318  [-0.531, 1.22] | 0.200  [-1.53, 1.48] | 0.00  [-0.730, 2.68] | 0.00  [-1.46, 2.01] |  |  |

**Supplemental Table 11.** Effect of using preservative tubes on urine chemistry analysis.

| **Analyte** | **N** | **Plain**  Median (Q1, Q3) | **Preservative**  Median (Q1, Q3) | **Percent Difference**  Median (Q1, Q3) | **ACL** | **Acceptable** |
| --- | --- | --- | --- | --- | --- | --- |
| **Albumin (g/L)** | 10 | 35 (5, 384) | 35 (5, 385) | 0.00 (-0.66, 0.00) | **11.4%** | **Yes** |
| **Amylase (U/L)** | 10 | 116 (42, 240) | 116 (42, 240) | 0.00 (0.00, 0.00) | **3.3%** | **Yes** |
| **Calcium (mmol/L)** | 10 | 1.42 (0.84, 3.96) | 1.44 (0.85, 3.98) | 1.14 (0.57, 1.35) | **4.9%** | **Yes** |
| **Chloride (mmol/L)** | 10 | 57 (37, 89) | 70 (36, 90) | 0.00 (0.00, 0.97) | **3.1%** | **Yes** |
| **Cortisol (mmol/L)** | 10 | 110 (39, 207) | 123 (52, 233) | 11.8 (3.90, 14.4) | **15.2%** | **Yes** |
| **Creatinine (umol/L)** | 10 | 6440 (2916, 10839) | 6458 (2920, 10850) | 0.28 (-0.14, 0.59) | **5.5%** | **Yes** |
| **Magnesium (mmol/L)** | 10 | 1.61 (1.45, 4.92) | 1.62 (144, 4.87) | 1.26 (0.18, 2.47) | **6.5%** | **Yes** |
| **Phosphorus (mmol/L)** | 10 | 0.11 (0.10, 0.21) | 0.11 (0.10, 0.21) | -0.33 (-0.59, 0.57) | **5.8%** | **Yes** |
| **Potassium (mmol/L)** | 10 | 8.99 (7.95, 17.4) | 9.10 (8.01, 17.4) | 0.28 (0.00, 0.73) | **2.5%** | **Yes** |
| **Protein (g/L)** | 10 | 19.3 (9.98, 29.7) | 21.2 (10.0, 20.7) | 0.00 (0.00, 0.00) | **4.5%** | **Yes** |
| **Sodium (mmol/L)** | 10 | 64 (39, 99) | 89 (61, 123) | 39.8 (23.9, 56.8) | **7.1%** | **No** |
| **Urea (mmol/L)** | 10 | 166 (189, 200) | 165 (91, 201) | 0.78 (-0.93, 1.36) | **5.8%** | **Yes** |
| **Urate (umol/L)** | 10 | 1350 (1040, 2000) | 1370 (1040, 2040) | 0.32 (-0.45, 0.51) | **6.5%** | **Yes** |
| **Osmolality (mOsm/Kg)** | 10 | 548 (252, 591) | 593 (297, 630) | 8.8 (8.2, 18.5) | **4.7%** | **No** |
